# Supplementary material for: Incidence of Gastric Neoplasms Arising from Autoimmune Metaplastic Atrophic Gastritis: A Systematic Review and Case Reports
Source: MDPI journal article supplement (doi:10.3390/jcm12031062), 2023-01-30

**Table S1.** Search strategy

| Search terms                                | Details                                                                                                                                                                                                                                                                                                                                                                                                                                             | Total |
|---------------------------------------------|-----------------------------------------------------------------------------------------------------------------------------------------------------------------------------------------------------------------------------------------------------------------------------------------------------------------------------------------------------------------------------------------------------------------------------------------------------|-------|
| Autoimmune gastritis gastric cancer         | ("gastritis, atrophic"[MeSH Terms] OR ("gastritis"[All Fields] AND "atrophic"[All Fields]) OR "atrophic gastritis"[All Fields] OR ("autoimmune"[All Fields] AND "gastritis"[All Fields]) OR "autoimmune gastritis"[All Fields]) AND ("stomach neoplasms"[MeSH Terms] OR ("stomach"[All Fields] AND "neoplasms"[All Fields]) OR "stomach neoplasms"[All Fields] OR ("gastric"[All Fields] AND "cancer"[All Fields]) OR "gastric cancer"[All Fields]) | 3,253 |
| Autoimmune gastritis gastric adenocarcinoma | ("gastritis, atrophic"[MeSH Terms] OR ("gastritis"[All Fields] AND "atrophic"[All Fields]) OR "atrophic gastritis"[All Fields] OR ("autoimmune"[All Fields] AND "gastritis"[All Fields]) OR "autoimmune gastritis"[All Fields]) AND ("stomach"[MeSH Terms] OR "stomach"[All Fields] OR "gastric"[All Fields]) AND ("adenocarcinoma"[MeSH Terms] OR "adenocarcinoma"[All Fields])                                                                    | 838   |
| Autoimmune gastritis gastric neoplas*       | ("gastritis, atrophic"[MeSH Terms] OR ("gastritis"[All Fields] AND "atrophic"[All Fields]) OR "atrophic gastritis"[All Fields] OR ("autoimmune"[All Fields] AND "gastritis"[All Fields]) OR "autoimmune gastritis"[All Fields]) AND (gastric neoplasia[All Fields] OR gastric neoplasias[All Fields] OR gastric neoplasm[All Fields] OR gastric neoplasms[All Fields])                                                                              | 2583  |
| Autoimmune gastritis gastric carcinoma      | ("gastritis, atrophic"[MeSH Terms] OR ("gastritis"[All Fields] AND "atrophic"[All Fields]) OR "atrophic gastritis"[All Fields] OR ("autoimmune"[All Fields] AND "gastritis"[All Fields]) OR "autoimmune gastritis"[All Fields]) AND ("stomach"[MeSH Terms] OR "stomach"[All Fields] OR "gastric"[All Fields]) AND ("carcinoma"[MeSH Terms] OR "carcinoma"[All Fields])                                                                              | 1110  |
| Autoimmune gastritis gastric tumor          | ("gastritis, atrophic"[MeSH Terms] OR ("gastritis"[All Fields] AND "atrophic"[All Fields]) OR "atrophic gastritis"[All Fields] OR ("autoimmune"[All Fields] AND "gastritis"[All Fields]) OR "autoimmune gastritis"[All Fields]) AND ("stomach neoplasms"[MeSH Terms] OR ("stomach"[All Fields] AND "neoplasms"[All Fields]) OR "stomach neoplasms"[All Fields] OR ("gastric"[All Fields] AND "tumor"[All Fields]) OR "gastric tumor"[All Fields])   | 2637  |
| Autoimmune gastritis gastric NET            | ("gastritis, atrophic"[MeSH Terms] OR ("gastritis"[All Fields] AND "atrophic"[All Fields]) OR "atrophic gastritis"[All Fields] OR ("autoimmune"[All Fields] AND "gastritis"[All Fields]) OR "autoimmune gastritis"[All Fields]) AND ("stomach"[MeSH Terms] OR "stomach"[All Fields] OR "gastric"[All Fields]) AND ("neuroendocrine tumors"[MeSH Terms] OR "carcinoid tumor"[MeSH Terms] OR "neuroendocrine"[All Fields])                            | 413   |

|                                            |                                                                                                                                                                                                                                                                                                                                                                                                             |      |
|--------------------------------------------|-------------------------------------------------------------------------------------------------------------------------------------------------------------------------------------------------------------------------------------------------------------------------------------------------------------------------------------------------------------------------------------------------------------|------|
| Autoimmune gastritis dysplasia             | ("gastritis, atrophic"[MeSH Terms] OR ("gastritis"[All Fields] AND "atrophic"[All Fields]) OR "atrophic gastritis"[All Fields] OR ("autoimmune"[All Fields] AND "gastritis"[All Fields]) OR "autoimmune gastritis"[All Fields]) AND ("stomach"[MeSH Terms] OR "stomach"[All Fields] OR "gastric"[All Fields]) AND "dysplasia"[All Fields]                                                                   | 682  |
| Autoimmune gastritis<br>Hyperplastic polyp | ("gastritis, atrophic"[MeSH Terms] OR ("gastritis"[All Fields] AND "atrophic"[All Fields]) OR "atrophic gastritis"[All Fields] OR ("autoimmune"[All Fields] AND "gastritis"[All Fields]) OR "autoimmune gastritis"[All Fields]) AND ("stomach"[MeSH Terms] OR "stomach"[All Fields] OR "gastric"[All Fields]) AND ("polyps"[MeSH Terms] OR "polyps"[All Fields] OR "polyposis"[All Fields])                 | 272  |
| Atrophic gastritis gastric cancer          | ("gastritis, atrophic"[MeSH Terms] OR ("gastritis"[All Fields] AND "atrophic"[All Fields]) OR "atrophic gastritis"[All Fields] OR ("atrophic"[All Fields] AND "gastritis"[All Fields])) AND ("stomach neoplasms"[MeSH Terms] OR ("stomach"[All Fields] AND "neoplasms"[All Fields]) OR "stomach neoplasms"[All Fields] OR ("gastric"[All Fields] AND "cancer"[All Fields]) OR "gastric cancer"[All Fields]) | 3084 |
| Atrophic gastritis gastric adenocarcinoma  | ("gastritis, atrophic"[MeSH Terms] OR ("gastritis"[All Fields] AND "atrophic"[All Fields]) OR "atrophic gastritis"[All Fields] OR ("atrophic"[All Fields] AND "gastritis"[All Fields])) AND ("stomach"[MeSH Terms] OR "stomach"[All Fields] OR "gastric"[All Fields]) AND ("adenocarcinoma"[MeSH Terms] OR "adenocarcinoma"[All Fields])                                                                    | 784  |
| Atrophic gastritis gastric neoplas*        | ("gastritis, atrophic"[MeSH Terms] OR ("gastritis"[All Fields] AND "atrophic"[All Fields]) OR "atrophic gastritis"[All Fields] OR ("atrophic"[All Fields] AND "gastritis"[All Fields])) AND (gastric neoplasia[All Fields] OR gastric neoplasias[All Fields] OR gastric neoplasm[All Fields] OR gastric neoplasms[All Fields])                                                                              | 2473 |
| Atrophic gastritis gastric carcinoma       | ("gastritis, atrophic"[MeSH Terms] OR ("gastritis"[All Fields] AND "atrophic"[All Fields]) OR "atrophic gastritis"[All Fields] OR ("atrophic"[All Fields] AND "gastritis"[All Fields])) AND ("stomach"[MeSH Terms] OR "stomach"[All Fields] OR "gastric"[All Fields]) AND ("carcinoma"[MeSH Terms] OR "carcinoma"[All Fields])                                                                              | 1063 |
| Atrophic gastritis gastric tumor           | ("gastritis, atrophic"[MeSH Terms] OR ("gastritis"[All Fields] AND "atrophic"[All Fields]) OR "atrophic gastritis"[All Fields] OR ("atrophic"[All Fields] AND "gastritis"[All Fields])) AND ("stomach neoplasms"[MeSH Terms] OR ("stomach"[All Fields] AND "neoplasms"[All Fields]) OR "stomach neoplasms"[All Fields] OR ("gastric"[All Fields] AND "tumor"[All Fields]) OR "gastric tumor"[All Fields])   | 2517 |
| Atrophic gastritis gastric NET             | ("gastritis, atrophic"[MeSH Terms] OR ("gastritis"[All Fields] AND "atrophic"[All Fields]) OR "atrophic gastritis"[All Fields] OR ("atrophic"[All Fields] AND "gastritis"[All Fields])) AND ("stomach"[MeSH Terms] OR "stomach"[All Fields])                                                                                                                                                                | 420  |

|                                         |                                                                                                                                                                                                                                                                                                                                                     |     |
|-----------------------------------------|-----------------------------------------------------------------------------------------------------------------------------------------------------------------------------------------------------------------------------------------------------------------------------------------------------------------------------------------------------|-----|
|                                         | Fields] OR "gastric"[All Fields]) AND (“neuroendocrine tumors”[MeSH Terms] OR “carcinoid tumor”[MeSH Terms] OR "neuroendocrine"[All Fields] OR “carcinoid”[All Fields])                                                                                                                                                                             |     |
| Atrophic gastritis dysplasia            | ("gastritis, atrophic"[MeSH Terms] OR ("gastritis"[All Fields] AND "atrophic"[All Fields]) OR "atrophic gastritis"[All Fields] OR ("atrophic"[All Fields] AND "gastritis"[All Fields])) AND ("stomach"[MeSH Terms] OR "stomach"[All Fields] OR "gastric"[All Fields]) AND “dysplasia”[All Fields]                                                   | 661 |
| Atrophic gastritis polyp                | ("gastritis, atrophic"[MeSH Terms] OR ("gastritis"[All Fields] AND "atrophic"[All Fields]) OR "atrophic gastritis"[All Fields] OR ("atrophic"[All Fields] AND "gastritis"[All Fields])) AND ("stomach"[MeSH Terms] OR "stomach"[All Fields] OR "gastric"[All Fields]) AND ("polyps"[MeSH Terms] OR "polyps"[All Fields] OR "polyposis"[All Fields]) | 247 |
| Type-A gastritis gastric cancer         | type-A[All Fields] AND ("gastritis"[MeSH Terms] OR "gastritis"[All Fields]) AND ("stomach neoplasms"[MeSH Terms] OR ("stomach"[All Fields] AND "neoplasms"[All Fields]) OR "stomach neoplasms"[All Fields] OR ("gastric"[All Fields] AND "cancer"[All Fields]) OR "gastric cancer"[All Fields])                                                     | 120 |
| Type-A gastritis gastric adenocarcinoma | type-A[All Fields] AND ("gastritis"[MeSH Terms] OR "gastritis"[All Fields]) AND ("stomach"[MeSH Terms] OR "stomach"[All Fields] OR "gastric"[All Fields]) AND ("adenocarcinoma"[MeSH Terms] OR "adenocarcinoma"[All Fields])                                                                                                                        | 79  |
| Type-A gastritis gastric neoplas*       | type-A[All Fields] AND ("gastritis"[MeSH Terms] OR "gastritis"[All Fields]) AND (gastric neoplasia[All Fields] OR gastric neoplasias[All Fields] OR gastric neoplasm[All Fields] OR gastric neoplasms[All Fields])                                                                                                                                  | 111 |
| Type-A gastritis gastric carcinoma      | type-A[All Fields] AND ("gastritis"[MeSH Terms] OR "gastritis"[All Fields]) AND ("stomach"[MeSH Terms] OR "stomach"[All Fields] OR "gastric"[All Fields]) AND ("carcinoma"[MeSH Terms] OR "carcinoma"[All Fields])                                                                                                                                  | 87  |
| Type-A gastritis gastric tumor          | type-A[All Fields] AND ("gastritis"[MeSH Terms] OR "gastritis"[All Fields]) AND ("stomach neoplasms"[MeSH Terms] OR ("stomach"[All Fields] AND "neoplasms"[All Fields]) OR "stomach neoplasms"[All Fields] OR ("gastric"[All Fields] AND "tumor"[All Fields]) OR "gastric tumor"[All Fields])                                                       | 115 |
| Type-A gastritis gastric NET            | type-A[All Fields] AND ("gastritis"[MeSH Terms] OR "gastritis"[All Fields]) AND ("stomach"[MeSH Terms] OR "stomach"[All Fields] OR "gastric"[All Fields]) AND (“neuroendocrine tumors”[MeSH Terms] OR “carcinoid tumor”[MeSH Terms] OR "neuroendocrine"[All Fields] OR “carcinoid”[All Fields])                                                     | 77  |

|                                          |                                                                                                                                                                                                                                                                                                                                                                                                                                             |     |
|------------------------------------------|---------------------------------------------------------------------------------------------------------------------------------------------------------------------------------------------------------------------------------------------------------------------------------------------------------------------------------------------------------------------------------------------------------------------------------------------|-----|
| Type-A gastritis dysplasia               | type-A[All Fields] AND ("gastritis"[MeSH Terms] OR "gastritis"[All Fields]) AND ("stomach"[MeSH Terms] OR "stomach"[All Fields] OR "gastric"[All Fields]) AND "dysplasia"[All Fields]                                                                                                                                                                                                                                                       | 14  |
| Type-A gastritis polyp                   | type-A[All Fields] AND ("gastritis"[MeSH Terms] OR "gastritis"[All Fields]) AND ("stomach"[MeSH Terms] OR "stomach"[All Fields] OR "gastric"[All Fields]) AND ("polyps"[MeSH Terms] OR "polyps"[All Fields] OR "polyposis"[All Fields])                                                                                                                                                                                                     | 20  |
| Pernicious anemia gastric cancer         | ("pernicious anaemia"[All Fields] OR "anemia, pernicious"[MeSH Terms] OR ("anemia"[All Fields] AND "pernicious"[All Fields]) OR "pernicious anemia"[All Fields] OR ("pernicious"[All Fields] AND "anemia"[All Fields])) AND ("stomach neoplasms"[MeSH Terms] OR ("stomach"[All Fields] AND "neoplasms"[All Fields]) OR "stomach neoplasms"[All Fields] OR ("gastric"[All Fields] AND "cancer"[All Fields]) OR "gastric cancer"[All Fields]) | 618 |
| Pernicious anemia gastric adenocarcinoma | ("pernicious anaemia"[All Fields] OR "anemia, pernicious"[MeSH Terms] OR ("anemia"[All Fields] AND "pernicious"[All Fields]) OR "pernicious anemia"[All Fields] OR ("pernicious"[All Fields] AND "anemia"[All Fields])) AND ("stomach"[MeSH Terms] OR "stomach"[All Fields] OR "gastric"[All Fields]) AND ("adenocarcinoma"[MeSH Terms] OR "adenocarcinoma"[All Fields])                                                                    | 210 |
| Pernicious anemia gastric neoplas*       | ("pernicious anaemia"[All Fields] OR "anemia, pernicious"[MeSH Terms] OR ("anemia"[All Fields] AND "pernicious"[All Fields]) OR "pernicious anemia"[All Fields] OR ("pernicious"[All Fields] AND "anemia"[All Fields])) AND (gastric neoplasia[All Fields] OR gastric neoplasias[All Fields] OR gastric neoplasm[All Fields] OR gastric neoplasms[All Fields])                                                                              | 594 |
| Pernicious anemia gastric carcinoma      | ("pernicious anaemia"[All Fields] OR "anemia, pernicious"[MeSH Terms] OR ("anemia"[All Fields] AND "pernicious"[All Fields]) OR "pernicious anemia"[All Fields] OR ("pernicious"[All Fields] AND "anemia"[All Fields])) AND ("stomach"[MeSH Terms] OR "stomach"[All Fields] OR "gastric"[All Fields]) AND ("carcinoma"[MeSH Terms] OR "carcinoma"[All Fields])                                                                              | 310 |
| Pernicious anemia gastric tumor          | ("pernicious anaemia"[All Fields] OR "anemia, pernicious"[MeSH Terms] OR ("anemia"[All Fields] AND "pernicious"[All Fields]) OR "pernicious anemia"[All Fields] OR ("pernicious"[All Fields] AND "anemia"[All Fields])) AND ("stomach neoplasms"[MeSH Terms] OR ("stomach"[All Fields] AND "neoplasms"[All Fields]) OR "stomach neoplasms"[All Fields] OR ("gastric"[All Fields] AND "tumor"[All Fields]) OR "gastric tumor"[All Fields])   | 591 |

|                                                |                                                                                                                                                                                                                                                                                                                                                                                                                                             |     |
|------------------------------------------------|---------------------------------------------------------------------------------------------------------------------------------------------------------------------------------------------------------------------------------------------------------------------------------------------------------------------------------------------------------------------------------------------------------------------------------------------|-----|
| Pernicious anemia<br>gastric NET               | ("pernicious anaemia"[All Fields] OR "anemia, pernicious"[MeSH Terms] OR ("anemia"[All Fields] AND "pernicious"[All Fields]) OR "pernicious anemia"[All Fields] OR ("pernicious"[All Fields] AND "anemia"[All Fields])) AND ("stomach"[MeSH Terms] OR "stomach"[All Fields] OR "gastric"[All Fields]) AND ("neuroendocrine tumors"[MeSH Terms] OR "carcinoid tumor"[MeSH Terms] OR "neuroendocrine"[All Fields] OR "carcinoid"[All Fields]) | 197 |
| Pernicious anemia<br>dysplasia                 | ("pernicious anaemia"[All Fields] OR "anemia, pernicious"[MeSH Terms] OR ("anemia"[All Fields] AND "pernicious"[All Fields]) OR "pernicious anemia"[All Fields] OR ("pernicious"[All Fields] AND "anemia"[All Fields])) AND ("stomach"[MeSH Terms] OR "stomach"[All Fields] OR "gastric"[All Fields]) AND "dysplasia"[All Fields]                                                                                                           | 41  |
| Pernicious anemia<br>polyp                     | ("pernicious anaemia"[All Fields] OR "anemia, pernicious"[MeSH Terms] OR ("anemia"[All Fields] AND "pernicious"[All Fields]) OR "pernicious anemia"[All Fields] OR ("pernicious"[All Fields] AND "anemia"[All Fields])) AND ("stomach"[MeSH Terms] OR "stomach"[All Fields] OR "gastric"[All Fields]) AND ("polyps"[MeSH Terms] OR "polyps"[All Fields] OR "polyposis"[All Fields])                                                         | 99  |
| Macrocytic anemia<br>gastric cancer            | "macrocytic anaemia"[All Fields] OR "anemia, macrocytic"[MeSH Terms] OR ("anemia"[All Fields] AND "macrocytic"[All Fields]) OR "macrocytic anemia"[All Fields] OR ("macrocytic"[All Fields] AND "anemia"[All Fields])) AND ("stomach neoplasms"[MeSH Terms] OR ("stomach"[All Fields] AND "neoplasms"[All Fields]) OR "stomach neoplasms"[All Fields] OR ("gastric"[All Fields] AND "cancer"[All Fields]) OR "gastric cancer"[All Fields])  | 519 |
| Macrocytic anemia<br>gastric<br>adenocarcinoma | "macrocytic anaemia"[All Fields] OR "anemia, macrocytic"[MeSH Terms] OR ("anemia"[All Fields] AND "macrocytic"[All Fields]) OR "macrocytic anemia"[All Fields] OR ("macrocytic"[All Fields] AND "anemia"[All Fields])) AND ("stomach"[MeSH Terms] OR "stomach"[All Fields] OR "gastric"[All Fields]) AND ("adenocarcinoma"[MeSH Terms] OR "adenocarcinoma"[All Fields])                                                                     | 139 |
| Macrocytic anemia<br>gastric neoplas*          | "macrocytic anaemia"[All Fields] OR "anemia, macrocytic"[MeSH Terms] OR ("anemia"[All Fields] AND "macrocytic"[All Fields]) OR "macrocytic anemia"[All Fields] OR ("macrocytic"[All Fields] AND "anemia"[All Fields])) AND (gastric neoplasia[All Fields] OR gastric neoplasias[All Fields] OR gastric neoplasm[All Fields] OR gastric neoplasms[All Fields])                                                                               | 514 |
| Macrocytic anemia<br>gastric carcinoma         | "macrocytic anaemia"[All Fields] OR "anemia, macrocytic"[MeSH Terms] OR ("anemia"[All Fields] AND "macrocytic"[All Fields]) OR "macrocytic anemia"[All Fields] OR ("macrocytic"[All Fields] AND "anemia"[All Fields])                                                                                                                                                                                                                       | 233 |

|                                             |                                                                                                                                                                                                                                                                                                                                                                                                                                            |     |
|---------------------------------------------|--------------------------------------------------------------------------------------------------------------------------------------------------------------------------------------------------------------------------------------------------------------------------------------------------------------------------------------------------------------------------------------------------------------------------------------------|-----|
|                                             | Fields))) AND ("stomach"[MeSH Terms] OR "stomach"[All Fields] OR "gastric"[All Fields]) AND ("carcinoma"[MeSH Terms] OR "carcinoma"[All Fields])                                                                                                                                                                                                                                                                                           |     |
| Macrocytic anemia gastric tumor             | "macrocytic anaemia"[All Fields] OR "anemia, macrocytic"[MeSH Terms] OR ("anemia"[All Fields] AND "macrocytic"[All Fields]) OR "macrocytic anemia"[All Fields] OR ("macrocytic"[All Fields] AND "anemia"[All Fields])) AND ("stomach neoplasms"[MeSH Terms] OR ("stomach"[All Fields] AND "neoplasms"[All Fields]) OR "stomach neoplasms"[All Fields] OR ("gastric"[All Fields] AND "tumor"[All Fields]) OR "gastric tumor"[All Fields])   | 499 |
| Macrocytic anemia gastric NET               | "macrocytic anaemia"[All Fields] OR "anemia, macrocytic"[MeSH Terms] OR ("anemia"[All Fields] AND "macrocytic"[All Fields]) OR "macrocytic anemia"[All Fields] OR ("macrocytic"[All Fields] AND "anemia"[All Fields])) AND ("stomach"[MeSH Terms] OR "stomach"[All Fields] OR "gastric"[All Fields]) AND ("neuroendocrine tumors"[MeSH Terms] OR "carcinoid tumor"[MeSH Terms] OR "neuroendocrine"[All Fields] OR "carcinoid"[All Fields]) | 111 |
| Macrocytic anemia dysplasia                 | "macrocytic anaemia"[All Fields] OR "anemia, macrocytic"[MeSH Terms] OR ("anemia"[All Fields] AND "macrocytic"[All Fields]) OR "macrocytic anemia"[All Fields] OR ("macrocytic"[All Fields] AND "anemia"[All Fields])) AND ("stomach"[MeSH Terms] OR "stomach"[All Fields] OR "gastric"[All Fields]) AND "dysplasia"[All Fields]                                                                                                           | 11  |
| Macrocytic anemia polyp                     | "macrocytic anaemia"[All Fields] OR "anemia, macrocytic"[MeSH Terms] OR ("anemia"[All Fields] AND "macrocytic"[All Fields]) OR "macrocytic anemia"[All Fields] OR ("macrocytic"[All Fields] AND "anemia"[All Fields])) AND ("stomach"[MeSH Terms] OR "stomach"[All Fields] OR "gastric"[All Fields]) AND ("polyps"[MeSH Terms] OR "polyps"[All Fields] OR "polyposis"[All Fields])                                                         | 78  |
| cobalamin deficiency gastric cancer         | ("vitamin b 12 deficiency"[MeSH Terms] OR "vitamin b 12 deficiency"[All Fields] OR ("cobalamin"[All Fields] AND "deficiency"[All Fields]) OR "cobalamin deficiency"[All Fields]) AND ("stomach neoplasms"[MeSH Terms] OR ("stomach"[All Fields] AND "neoplasms"[All Fields]) OR "stomach neoplasms"[All Fields] OR ("gastric"[All Fields] AND "cancer"[All Fields]) OR "gastric cancer"[All Fields])                                       | 552 |
| cobalamin deficiency gastric adenocarcinoma | ("vitamin b 12 deficiency"[MeSH Terms] OR "vitamin b 12 deficiency"[All Fields] OR ("cobalamin"[All Fields] AND "deficiency"[All Fields]) OR "cobalamin deficiency"[All Fields]) AND ("stomach"[MeSH Terms] OR "stomach"[All Fields] OR "gastric"[All Fields]) AND ("adenocarcinoma"[MeSH Terms] OR "adenocarcinoma"[All Fields])                                                                                                          | 145 |

|                                        |                                                                                                                                                                                                                                                                                                                                                                                                      |     |
|----------------------------------------|------------------------------------------------------------------------------------------------------------------------------------------------------------------------------------------------------------------------------------------------------------------------------------------------------------------------------------------------------------------------------------------------------|-----|
|                                        |                                                                                                                                                                                                                                                                                                                                                                                                      |     |
| cobalamin deficiency gastric neoplas*  | ("vitamin b 12 deficiency"[MeSH Terms] OR "vitamin b 12 deficiency"[All Fields] OR ("cobalamin"[All Fields] AND "deficiency"[All Fields]) OR "cobalamin deficiency"[All Fields]) AND (gastric neoplasia[All Fields] OR gastric neoplasias[All Fields] OR gastric neoplasm[All Fields] OR gastric neoplasms[All Fields])                                                                              | 537 |
| cobalamin deficiency gastric carcinoma | ("vitamin b 12 deficiency"[MeSH Terms] OR "vitamin b 12 deficiency"[All Fields] OR ("cobalamin"[All Fields] AND "deficiency"[All Fields]) OR "cobalamin deficiency"[All Fields]) AND ("stomach"[MeSH Terms] OR "stomach"[All Fields] OR "gastric"[All Fields]) AND ("carcinoma"[MeSH Terms] OR "carcinoma"[All Fields])                                                                              | 239 |
| cobalamin deficiency gastric tumor     | ("vitamin b 12 deficiency"[MeSH Terms] OR "vitamin b 12 deficiency"[All Fields] OR ("cobalamin"[All Fields] AND "deficiency"[All Fields]) OR "cobalamin deficiency"[All Fields]) AND ("stomach neoplasms"[MeSH Terms] OR "stomach"[All Fields] AND "neoplasms"[All Fields]) OR "stomach neoplasms"[All Fields] OR ("gastric"[All Fields] AND "tumor"[All Fields]) OR "gastric tumor"[All Fields])    | 521 |
| cobalamin deficiency gastric NET       | ("vitamin b 12 deficiency"[MeSH Terms] OR "vitamin b 12 deficiency"[All Fields] OR ("cobalamin"[All Fields] AND "deficiency"[All Fields]) OR "cobalamin deficiency"[All Fields]) AND ("stomach"[MeSH Terms] OR "stomach"[All Fields] OR "gastric"[All Fields]) AND ("neuroendocrine tumors"[MeSH Terms] OR "carcinoid tumor"[MeSH Terms] OR "neuroendocrine"[All Fields] OR "carcinoid"[All Fields]) | 118 |
| cobalamin deficiency dysplasia         | ("vitamin b 12 deficiency"[MeSH Terms] OR "vitamin b 12 deficiency"[All Fields] OR ("cobalamin"[All Fields] AND "deficiency"[All Fields]) OR "cobalamin deficiency"[All Fields]) AND ("stomach"[MeSH Terms] OR "stomach"[All Fields] OR "gastric"[All Fields]) AND "dysplasia"[All Fields]                                                                                                           | 12  |
| cobalamin deficiency polyp             | ("vitamin b 12 deficiency"[MeSH Terms] OR "vitamin b 12 deficiency"[All Fields] OR ("cobalamin"[All Fields] AND "deficiency"[All Fields]) OR "cobalamin deficiency"[All Fields]) AND ("stomach"[MeSH Terms] OR "stomach"[All Fields] OR "gastric"[All Fields]) AND ("polyps"[MeSH Terms] OR "polyps"[All Fields] OR "polyposis"[All Fields])                                                         | 81  |
| Vitamin B12 deficiency gastric cancer  | ("vitamin b 12 deficiency"[MeSH Terms] OR "vitamin b 12 deficiency"[All Fields]) AND ("stomach neoplasms"[MeSH Terms] OR "stomach"[All Fields] AND "neoplasms"[All Fields]) OR "stomach neoplasms"[All Fields] OR ("gastric"[All Fields] AND "cancer"[All Fields]) OR "gastric cancer"[All Fields])                                                                                                  | 547 |

|                                               |                                                                                                                                                                                                                                                                                                      |     |
|-----------------------------------------------|------------------------------------------------------------------------------------------------------------------------------------------------------------------------------------------------------------------------------------------------------------------------------------------------------|-----|
| Vitamin B12 deficiency gastric adenocarcinoma | ("vitamin b 12 deficiency"[MeSH Terms] OR "vitamin b 12 deficiency"[All Fields]) AND ("stomach"[MeSH Terms] OR "stomach"[All Fields] OR "gastric"[All Fields]) AND ("adenocarcinoma"[MeSH Terms] OR "adenocarcinoma"[All Fields])                                                                    | 145 |
| Vitamin B12 deficiency gastric neoplas*       | ("vitamin b 12 deficiency"[MeSH Terms] OR "vitamin b 12 deficiency"[All Fields]) AND (gastric neoplasia[All Fields] OR gastric neoplasias[All Fields] OR gastric neoplasm[All Fields] OR gastric neoplasms[All Fields])                                                                              | 535 |
| Vitamin B12 deficiency gastric carcinoma      | ("vitamin b 12 deficiency"[MeSH Terms] OR "vitamin b 12 deficiency"[All Fields]) AND ("stomach"[MeSH Terms] OR "stomach"[All Fields] OR "gastric"[All Fields]) AND ("carcinoma"[MeSH Terms] OR "carcinoma"[All Fields])                                                                              | 239 |
| Vitamin B12 deficiency gastric tumor          | ("vitamin b 12 deficiency"[MeSH Terms] OR "vitamin b 12 deficiency"[All Fields]) AND ("stomach neoplasms"[MeSH Terms] OR ("stomach"[All Fields] AND "neoplasms"[All Fields]) OR "stomach neoplasms"[All Fields] OR ("gastric"[All Fields] AND "tumor"[All Fields]) OR "gastric tumor"[All Fields])   | 519 |
| Vitamin B12 deficiency gastric NET            | ("vitamin b 12 deficiency"[MeSH Terms] OR "vitamin b 12 deficiency"[All Fields]) AND ("stomach"[MeSH Terms] OR "stomach"[All Fields] OR "gastric"[All Fields]) AND ("neuroendocrine tumors"[MeSH Terms] OR "carcinoid tumor"[MeSH Terms] OR "neuroendocrine"[All Fields] OR "carcinoid"[All Fields]) | 118 |
| Vitamin B12 deficiency dysplasia              | ("vitamin b 12 deficiency"[MeSH Terms] OR "vitamin b 12 deficiency"[All Fields]) AND ("stomach"[MeSH Terms] OR "stomach"[All Fields] OR "gastric"[All Fields]) AND "dysplasia"[All Fields]                                                                                                           | 12  |
| Vitamin B12 deficiency polyp                  | ("vitamin b 12 deficiency"[MeSH Terms] OR "vitamin b 12 deficiency"[All Fields]) AND ("stomach"[MeSH Terms] OR "stomach"[All Fields] OR "gastric"[All Fields]) AND ("polyps"[MeSH Terms] OR "polyps"[All Fields] OR "polyposis"[All Fields])                                                         | 81  |



|                                                    |                                                                                                                                                                                                                                                                                                                                                                                                              |    |
|----------------------------------------------------|--------------------------------------------------------------------------------------------------------------------------------------------------------------------------------------------------------------------------------------------------------------------------------------------------------------------------------------------------------------------------------------------------------------|----|
| Intrinsic factor deficiency gastric cancer         | ("intrinsic factor"[MeSH Terms] OR ("intrinsic"[All Fields] AND "factor"[All Fields]) OR "intrinsic factor"[All Fields]) AND ("deficiency"[Subheading] OR "deficiency"[All Fields]) AND ("stomach neoplasms"[MeSH Terms] OR ("stomach"[All Fields] AND "neoplasms"[All Fields]) OR "stomach neoplasms"[All Fields] OR ("gastric"[All Fields] AND "cancer"[All Fields]) OR "gastric cancer"[All Fields])      | 34 |
| Intrinsic factor deficiency gastric adenocarcinoma | ("intrinsic factor"[MeSH Terms] OR ("intrinsic"[All Fields] AND "factor"[All Fields]) OR "intrinsic factor"[All Fields]) AND ("deficiency"[Subheading] OR "deficiency"[All Fields]) AND ("stomach"[MeSH Terms] OR "stomach"[All Fields] OR "gastric"[All Fields]) AND ("adenocarcinoma"[MeSH Terms] OR "adenocarcinoma"[All Fields])                                                                         | 10 |
| Intrinsic factor deficiency gastric neoplas*       | ("intrinsic factor"[MeSH Terms] OR ("intrinsic"[All Fields] AND "factor"[All Fields]) OR "intrinsic factor"[All Fields]) AND ("deficiency"[Subheading] OR "deficiency"[All Fields]) AND (gastric neoplasia[All Fields] OR gastric neoplasias[All Fields] OR gastric neoplasm[All Fields] OR gastric neoplasms[All Fields])                                                                                   | 26 |
| Intrinsic factor deficiency gastric carcinoma      | ("intrinsic factor"[MeSH Terms] OR ("intrinsic"[All Fields] AND "factor"[All Fields]) OR "intrinsic factor"[All Fields]) AND ("deficiency"[Subheading] OR "deficiency"[All Fields]) AND ("stomach"[MeSH Terms] OR "stomach"[All Fields] OR "gastric"[All Fields]) AND ("carcinoma"[MeSH Terms] OR "carcinoma"[All Fields])                                                                                   | 9  |
| Intrinsic factor deficiency gastric tumor          | ("intrinsic factor"[MeSH Terms] OR ("intrinsic"[All Fields] AND "factor"[All Fields]) OR "intrinsic factor"[All Fields]) AND ("deficiency"[Subheading] OR "deficiency"[All Fields]) AND ("stomach neoplasms"[MeSH Terms] OR ("stomach"[All Fields] AND "neoplasms"[All Fields]) OR "stomach neoplasms"[All Fields] OR ("gastric"[All Fields] AND "tumor"[All Fields]) OR "gastric tumor"[All Fields])        | 25 |
| Intrinsic factor deficiency gastric NET            | ("intrinsic factor"[MeSH Terms] OR ("intrinsic"[All Fields] AND "factor"[All Fields]) OR "intrinsic factor"[All Fields]) AND ("deficiency"[Subheading] OR "deficiency"[All Fields]) AND ("stomach"[MeSH Terms] OR "stomach"[All Fields] OR "gastric"[All Fields]) AND ("neuroendocrine tumors"[MeSH Terms] OR "neuroendocrine tumor"[MeSH Terms] OR "neuroendocrine"[All Fields] OR "carcinoid"[All Fields]) | 8  |

|                                                                                                                                                                                                                        |                                                                                                                                                                                                                                                                                                                                                 |     |
|------------------------------------------------------------------------------------------------------------------------------------------------------------------------------------------------------------------------|-------------------------------------------------------------------------------------------------------------------------------------------------------------------------------------------------------------------------------------------------------------------------------------------------------------------------------------------------|-----|
| Intrinsic factor deficiency dysplasia                                                                                                                                                                                  | ("intrinsic factor"[MeSH Terms] OR ("intrinsic"[All Fields] AND "factor"[All Fields]) OR "intrinsic factor"[All Fields]) AND ("deficiency"[Subheading] OR "deficiency"[All Fields]) AND ("stomach"[MeSH Terms] OR "stomach"[All Fields] OR "gastric"[All Fields]) AND "dysplasia"[All Fields]                                                   | 1   |
| Intrinsic factor deficiency polyp                                                                                                                                                                                      | ("intrinsic factor"[MeSH Terms] OR ("intrinsic"[All Fields] AND "factor"[All Fields]) OR "intrinsic factor"[All Fields]) AND ("deficiency"[Subheading] OR "deficiency"[All Fields]) AND ("stomach"[MeSH Terms] OR "stomach"[All Fields] OR "gastric"[All Fields]) AND ("polyps"[MeSH Terms] OR "polyps"[All Fields] OR "polyposis"[All Fields]) | 3   |
| 'intrinsic factor deficiency':ti,ab,kw AND gastric:ti,ab,kw AND (tumor:ti,ab,kw OR cancer:ti,ab,kw OR neoplasm:ti,ab,kw OR adenocarcinoma:ti,ab,kw OR polyp:ti,ab,kw OR dysplasia:ti,ab,kw OR neuroendocrine:ti,ab,kw) |                                                                                                                                                                                                                                                                                                                                                 | 7   |
| 'vitamin b12 deficiency':ti,ab,kw AND gastric:ti,ab,kw AND (tumor:ti,ab,kw OR cancer:ti,ab,kw OR neoplasm:ti,ab,kw OR adenocarcinoma:ti,ab,kw OR polyp:ti,ab,kw OR dysplasia:ti,ab,kw OR neuroendocrine:ti,ab,kw)      |                                                                                                                                                                                                                                                                                                                                                 | 91  |
| 'cobalamin deficiency':ti,ab,kw AND gastric:ti,ab,kw AND (tumor:ti,ab,kw OR cancer:ti,ab,kw OR neoplasm:ti,ab,kw OR adenocarcinoma:ti,ab,kw OR polyp:ti,ab,kw OR dysplasia:ti,ab,kw OR neuroendocrine:ti,ab,kw)        |                                                                                                                                                                                                                                                                                                                                                 | 21  |
| 'macrocytic anemia':ti,ab,kw AND gastric:ti,ab,kw AND (tumor:ti,ab,kw OR cancer:ti,ab,kw OR neoplasm:ti,ab,kw OR adenocarcinoma:ti,ab,kw OR polyp:ti,ab,kw OR dysplasia:ti,ab,kw OR neuroendocrine:ti,ab,kw)           |                                                                                                                                                                                                                                                                                                                                                 | 31  |
| 'autoimmune gastritis':ti,ab,kw AND gastric:ti,ab,kw AND (tumor:ti,ab,kw OR cancer:ti,ab,kw OR neoplasm:ti,ab,kw OR adenocarcinoma:ti,ab,kw OR polyp:ti,ab,kw OR dysplasia:ti,ab,kw OR neuroendocrine:ti,ab,kw)        |                                                                                                                                                                                                                                                                                                                                                 | 319 |
| 'type-a gastritis':ti,ab,kw AND gastric:ti,ab,kw AND (tumor:ti,ab,kw OR cancer:ti,ab,kw OR neoplasm:ti,ab,kw OR adenocarcinoma:ti,ab,kw OR polyp:ti,ab,kw OR dysplasia:ti,ab,kw OR neuroendocrine:ti,ab,kw)            |                                                                                                                                                                                                                                                                                                                                                 | 51  |
| 'pernicious anemia':ti,ab,kw AND gastric:ti,ab,kw AND (tumor:ti,ab,kw OR cancer:ti,ab,kw OR neoplasm:ti,ab,kw OR adenocarcinoma:ti,ab,kw OR polyp:ti,ab,kw OR dysplasia:ti,ab,kw OR neuroendocrine:ti,ab,kw)           |                                                                                                                                                                                                                                                                                                                                                 | 356 |

**Table S2.** Quality assessment of included studies

| First Author                | Q1  | Q2  | Q3  | Q4  | Q5  | Q6  | Q7  | Q8  | Q9  | Q10 | Total<br>QA<br>score |
|-----------------------------|-----|-----|-----|-----|-----|-----|-----|-----|-----|-----|----------------------|
| Rugge et al. [9]            | YES | YES | YES | YES | NO  | YES | YES | YES | YES | YES | 9                    |
| Esposito et al [10]         | YES | 10                   |
| Miceli et al. [11]          | YES | 10                   |
| Mahmud et al. [12]          | YES | 10                   |
| Chan et al. [13]            | YES | 10                   |
| Ye et al. [19]              | YES | YES | YES | YES | YES | YES | NO  | YES | YES | YES | 9                    |
| Bresky et al. [14]          | YES | YES | YES | YES | YES | NO  | NO  | YES | NO  | YES | 7                    |
| Kokkola et al. [15]         | YES | YES | YES | YES | NO  | YES | NO  | YES | YES | YES | 8                    |
| Mellemkjaerl et al.<br>[20] | YES | YES | YES | YES | YES | YES | NO  | NO  | YES | YES | 8                    |
| Brinton et al. [21]         | YES | YES | YES | YES | YES | YES | NO  | NO  | YES | YES | 8                    |
| Borch et al. [16]           | YES | YES | YES | YES | YES | NO  | NO  | YES | NO  | YES | 7                    |
| Schafer et al. [17]         | YES | YES | YES | YES | YES | YES | NO  | YES | YES | YES | 9                    |
| Elsborg et al. [18]         | NO  | NO  | NO  | YES | YES | YES | NO  | YES | YES | YES | 6                    |

**Table S3.** Publication bias assessment using the funnel plot and The Egger test

|     | Funnel plot                                                                                                                                                                                                                                                                                                                                                                                                                                                                                                                                                                                                                                                                           | P value for the Egger test |
|-----|---------------------------------------------------------------------------------------------------------------------------------------------------------------------------------------------------------------------------------------------------------------------------------------------------------------------------------------------------------------------------------------------------------------------------------------------------------------------------------------------------------------------------------------------------------------------------------------------------------------------------------------------------------------------------------------|----------------------------|
| GC  | 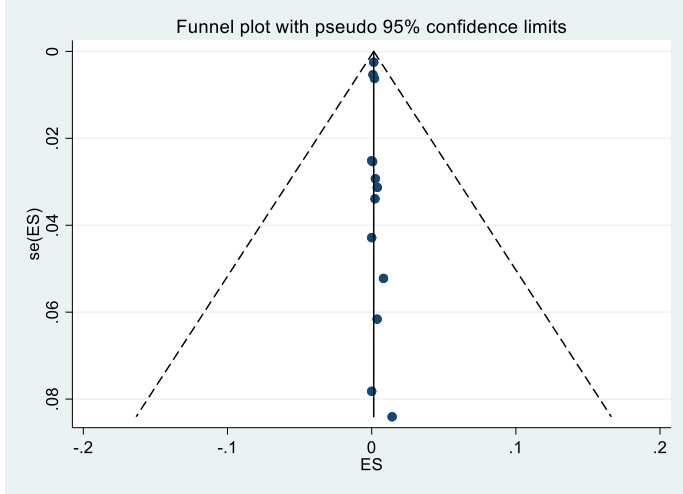 <p>Funnel plot with pseudo 95% confidence limits</p> <p>The plot shows the standard error of the effect size (se(ES)) on the y-axis (ranging from 0 to 0.08) against the effect size (ES) on the x-axis (ranging from -0.2 to 0.2). A vertical line at ES=0 and two dashed diagonal lines forming a triangle represent the 95% confidence limits. Most data points are clustered near the center (ES=0) and fall within the confidence limits.</p>                                                                                                                                                 | 0.183                      |
| LGD |  <p>Funnel plot with pseudo 95% confidence limits</p> <p>The plot shows the standard error of the effect size (se(ES)) on the y-axis (ranging from 0 to 0.08) against the effect size (ES) on the x-axis (ranging from -0.2 to 0.2). A vertical line at ES=0 and two dashed diagonal lines forming a triangle represent the 95% confidence limits. Most data points are clustered near the center (ES=0) and fall within the confidence limits. One point is an outlier, located at approximately ES=0.03 and se(ES)=0.075, falling outside the upper right boundary of the confidence limits.</p> | 0.081                      |

Type 1 gNET

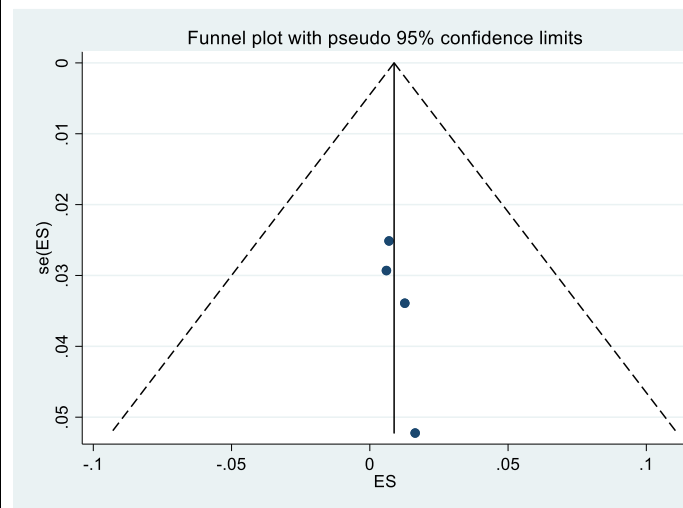

0.134

Figure S1. Sensitivity analysis [9–11,13–16,18]

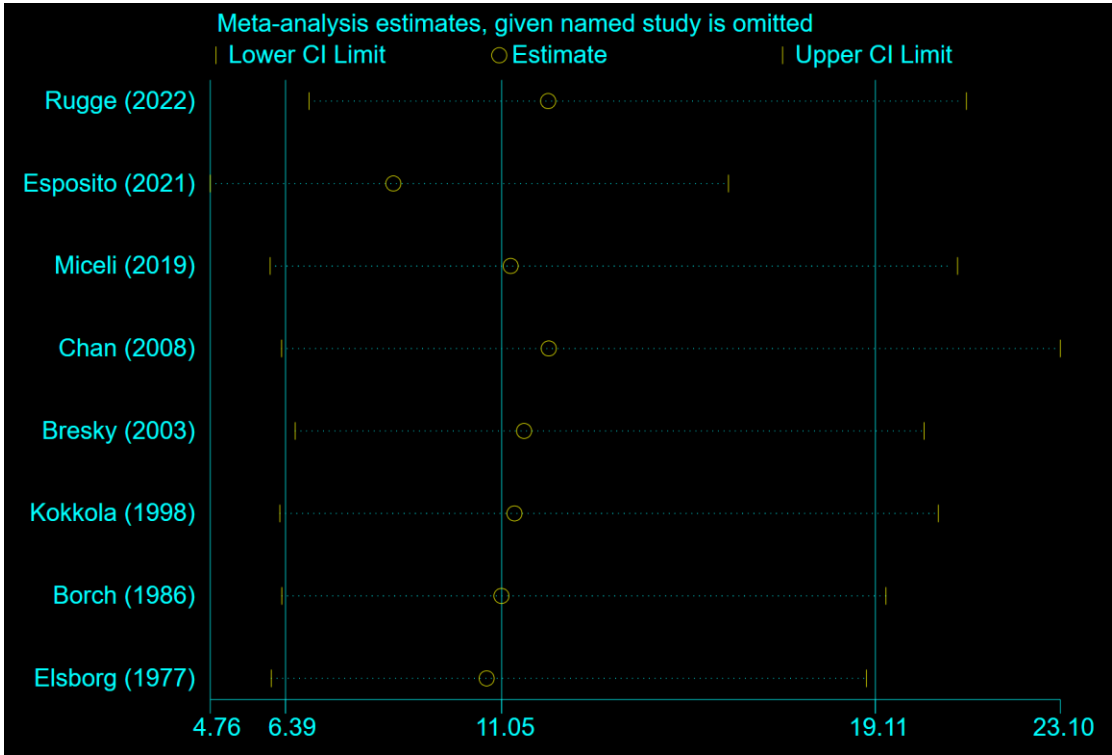

Supplement: s1 [file s1]
